# Supplementary material for: Integrated transcriptome, small RNA and degradome sequencing approaches proffer insights into chlorogenic acid biosynthesis in leafy sweet potato
Source: PubMed Central journal article supplement (PMC7822329; doi:10.1371/journal.pone.0245266), 2021-01-22

**A**

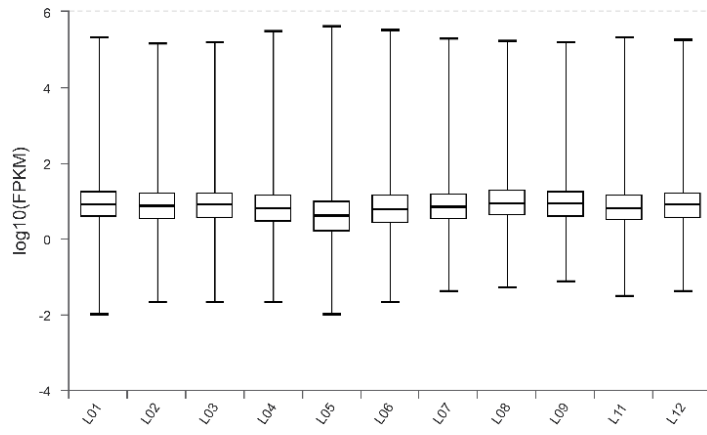

**B**

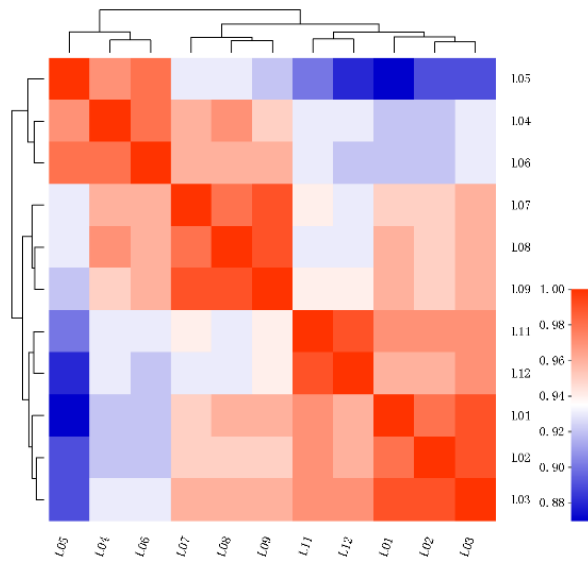

Supplement: pone.0245266.s012.pdf [file pone.0245266.s012.pdf]
